# Supplementary material for: Bottom-up approach to build osteon-like structure by cell-laden photocrosslinkable hydrogel
Source: Royal Society of Chemistry journal article supplement (doi:10.1039/c2cc16744a), 2012-01-01
Supplement: c2cc16744a.pdf [file c2cc16744a.pdf]

## Supplementary Information

### Bottom-up approach to build osteon-like structure by cell-laden photocrosslinkable hydrogel

Yicong Zuo<sup>1</sup>, Wenqian Xiao<sup>1</sup>, Xiaoqin Chen, Yajun Tang, Hongrong Luo, Hongsong Fan \*

National Engineering Research Center for Biomaterials, Sichuan University,  
610064, Chengdu, P. R. China.

#### Materials

Poly (ethylene glycol) dimethacrylate polymer (PEGDMA, Mw=1000 Da), Gelatin (Porcine Type A, Cat No.G2500), Methacrylic anhydride (MA), PKH26/67, 3-(trimethoxysilyl)propyl methacrylate (TMSPPMA), Propidium iodide (PI), Fluorescein diacetate (FDA) and 2-Hydroxy-4'-(2-hydroxyethoxy)-2-methylpropiophenone (Irgacure 2959, I 2959) were obtained from Sigma-Aldrich. Rabbit anti-osteocalcin (OCN)/PE, rabbit anti-von Willebrand factor (VWF)/FITC and 4',6-diamidino-2-phenylindole (DAPI) were obtained from Beijing Biosynthesis Biotechnology Co. LTD. The UV light source (Omniculture S1500) was purchased from EXFO Photonic Solutions Inc. Photomasks were designed by using AutoCAD 2007 and printed on transparencies with 20,000-dpi resolution from Qingyi Precision Maskmaking (Shenzhen) Co., LTD. All other chemicals were acquired from Chengdu Kelong Chem Co unless otherwise specified.

#### Preparation of prepolymer solutions

PEGDMA solution was prepared by mixing 20% (wt/wt) of PEGDMA, 80% (wt/wt) of Dulbecco's Phosphate Buffered Saline (DPBS) and 1% (wt/wt) of I2959, then stirred until the PEGDMA and photoinitiator completely dissolved.

GelMA (methacrylated gelatin) was synthesized as the following steps. 10 g of gelatin were dissolved in 100 mL of DPBS (pH 7.4) and stirred at 50°C. A volume of 10 mL of methacrylic anhydride was added slowly. The mixture was stirred for 3 hours at approximately

50°C, and then diluted with 500 mL DPBS. Lastly, the solution was dialyzed against distilled water using a 12-14KDa cutoff dialysis tubing at 37°C for 1 week, and freeze-dried until a constant weight was reached. Gel-MA solution was prepared by mixing 5% (wt/wt) GelMA, 95% (wt/wt) of Dulbecco's Phosphate Buffered Saline (DPBS) and 0.1% (wt/wt) I 2959, then stirred until the GelMA and photoinitiator completely dissolved.

### **Fabrication of osteon-like structures**

In method 1 (**Fig. S1A**), namely "circle-and-cross", after pipetting 180µL of PEGDMA prepolymer solution on the middle of a glass slide on which three spacer slides (with a thickness of 150µm) were placed to control the height of the gels, a cover slide was put on the solution. Subsequently, a photomask was placed on the top slide and microgels formation was induced by exposing the prepolymer to UV light for 27s (360–480 nm; 7.9mW/cm<sup>2</sup>). After first crosslinking, the glass slide with microgels was transferred into a petri dish containing 25mL of mineral oil and the microgel arrays were manually assembled by swiping a syringe needle along the surface of the slide straightly. A second crosslinking was performed to stabilize the final constructs composed of circle-shaped microgel assemblies and cross-shaped microgel assemblies for 7s.

In method 2 (**Fig. S1B**), namely "layer-by-layer", we used GelMA as the material. The circle-shaped microgels were formed as mentioned in method 1 by 20s of UV lighting instead. The glass slide with the microgels was then placed on another prepolymer solution, and a relevant photomask covering the circle part was placed on the slide. At last, the solution was exposed to UV light for 20s. The single hydrogel layer was formed and separated from the glass slide to be manually assembled layer by layer into a larger structures stabilized by 5s of UV lighting.

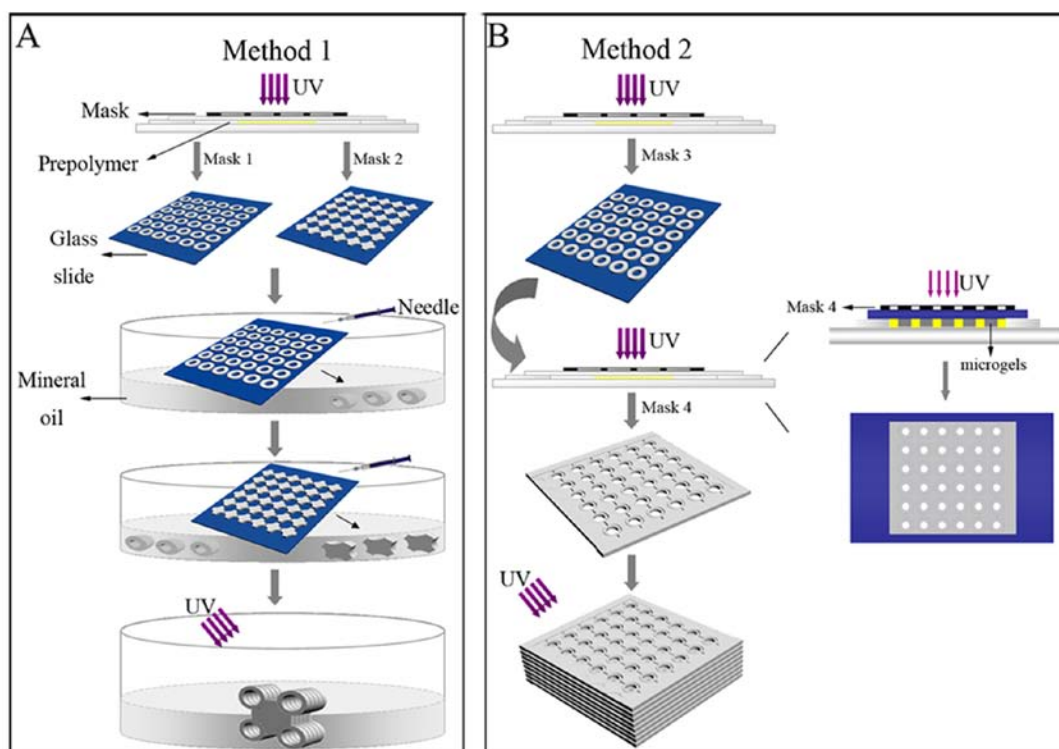

**Fig. S1** Schematic illustration of fabricating the osteon-like structures (A-"circle-and-cross" method, B-"layer-by-layer" method).

### Perfusion test

To test the connectivity of the channels within osteon-like microgel assemblies, Rhodamine B dye solution was perfused into these channels and the whole process was observed under fluorescent microscopy (Leicactr 4000), in the meanwhile, to verify mass transfer among the constituting microgels. As shown in **Fig. S2**, a TMSPMA treated glass slide was used to stabilize the constructs onside, and the two needles with 0.5mm diameter inserted into the two sides of the construct to act as an inlet and outlet were just fit for the channel with the same diameter. Rhodamine B dye solution was perfused at an average flow rate of 15  $\mu\text{l}/\text{min}$  and the distribution images of the dye in the microchannels were taken. Because of the limited view of our microscopy device, we merely perfused one of the four channels in "circle-and-cross" assembled structures and a channel next to the edge in "layer-by-layer" assembled structures for a clear view of the perfusion process.

The methodology of using TMSPMA was described as the followings:

1. Put a glass beaker in a bucket of ice (Caution: this is a very exothermic reaction releasing a lot of heat), weigh 50 g of NaOH pellets, slowly add 450 mL of distilled water and

have all pellets dissolved.

2. In the same beaker, place the slides in a staggered manner, make sure all of them contact with the NaOH solution.

3. Cover the beaker with a pyrex dish (Caution: do not use aluminum foil to cover as NaOH reacts with aluminum producing gaseous side products)

4. Let it sit overnight in the fume hood.

5. Discard the 10% NaOH solution into the proper waste bottle. Then with gloves, thoroughly rinse and rub each slide one by one under distilled water.

6. Dip each slide in 3 distinct 100% reagent alcohol baths and let it air dry (faster under the hood).

7. Wrap the glass slides with aluminum foil and bake for 1h at 80°C.

8. TMSPMA treatment (under the fume hood):

a. Stack slides vertically and pour 3 mL of TMSPMA on top of the stack using a syringe.

b. After 30 min, flip the stack upside down to get even coating.

9. Cover the beaker with aluminum foil and bake the whole assembly in the beaker overnight at 80°C.

10. Clean the slides in reagent alcohol again with 3 baths and air dry.

11. Wrap the glass slides with aluminum foil and bake again for 1-2 hours at 80°C.

12. Store the TMSPMA coated glass slides wrapped in aluminum foil at room temperature.

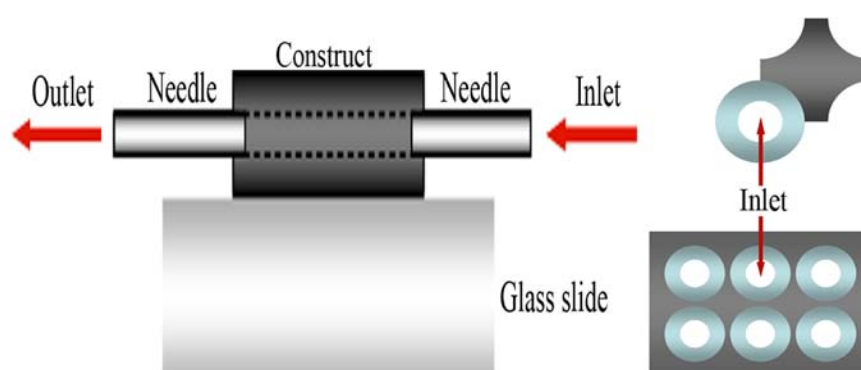

**Fig. S2** Schematic illustration of the perfusion process. Platform of perfusion is mainly composed of a glass slide to stabilize microgels and two needles functioning as inlet and outlet inserted into the two ends of the assembly.

### **Cell culture and encapsulation**

HUVECs and MG 63 came from CCTCC (China Center for Type Culture Collection).

All cells were cultured in a standard cell culture incubator in a 5% CO<sub>2</sub> atmosphere at 37°C. MG63 and HUVECs were separately maintained in Dulbecco's modified eagle medium (DMEM; Gibco) supplemented with 10% FBS, 1% Penicillin/Streptomycin changed every 2 days.

To encapsulate HUVECs and MG63 cells within the PEGDMA/GelMA solution, the cells were trypsinized, counted and resuspended in prepolymer solution before polymerization at a specific relevant concentration.

### **Confocal image analysis**

To check the availability of assemble processes for biological applications in both methods, cell-laden microgels and assemblies were collected after each step in assembly procedure and analyzed for cell viability. Cells within hydrogel were stained by Live/Dead dyes (1 µL of FDA and 1 µL of PI) in 1mL of DPBS for 2 min and visualized under a confocal laser scanning microscope (CLSM, Leica-TCS-SP5, German) to get fluorescence images for quantitatively analysis using Image Pro software (Media Cybernetics, Bethesda, MD). Cell viability was determined for cells within microgels which were formed by prepolymer solution being exposed to a first UV light, immersed in mineral oil, and then exposed to UV light for a second time (**Fig. S3**).

To study further cell behaviors, cell-laden assemblies in "layer-by-layer" method were collected after being cultured for 1, 3, 5 and 7 days in cell culture medium, and cell morphology was characterized by being stained with Live/Dead dyes and analyzed via confocal images (**Fig. S4**).

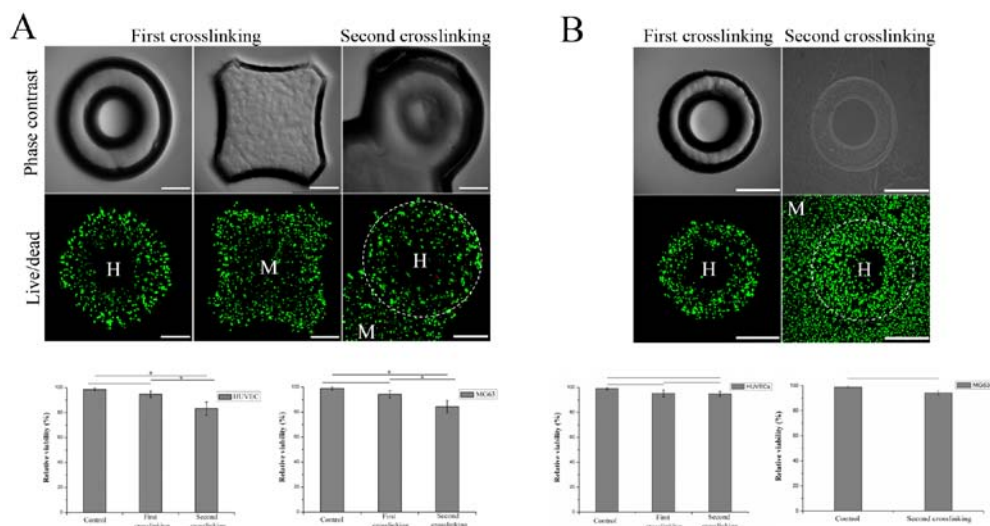

**Fig. S3** Cell viability during assembly process. (A) Phase-contrast and fluorescent images of the cell-laden microgels and assemblies after first and second crosslinking, and quantitative statistics of cell viability during each step in the “circle-and-cross” method. (B) Phase-contrast and fluorescent images of the cell-laden microgels and single hydrogel layer after first and second crosslinking, and quantitative statistics of cell viability during each step in the “layer-by-layer” method. Scale bars: 500  $\mu\text{m}$ . Cell seeding density:  $1 \times 10^7$  cells/ml (A),  $4 \times 10^6$  cells/ml (B). Values represent mean and standard deviation ( $N = 5$ ).  $P < 0.05$ . \* denotes significant difference. M stands for MG63 and H stands for HUVECs.

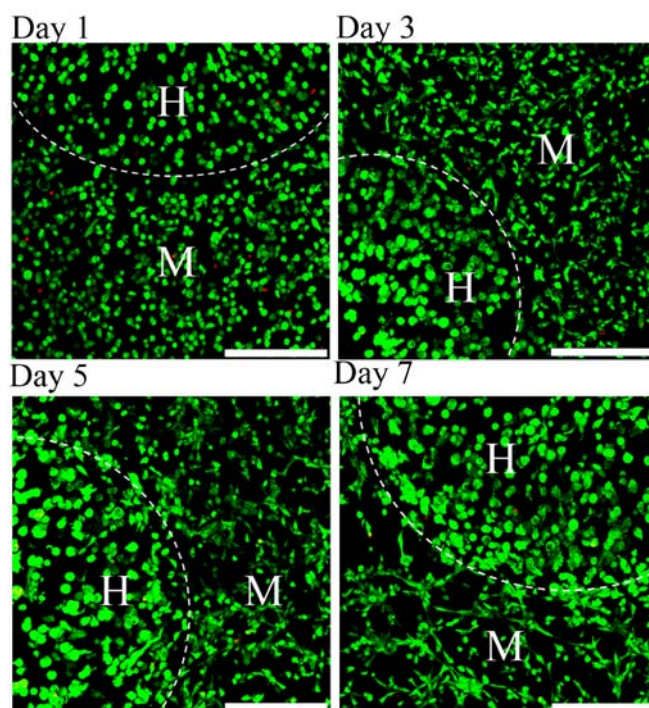

**Fig. S4** Higher magnification confocal images of single cell-laden hydrogel layer in “layer-by-layer”

method after being cultured for 1, 3, 5 and 7 days to show cell morphology and viability. Scale bars: 250  $\mu\text{m}$ . Cell seeding density:  $4 \times 10^6$  cells/ml. M stands for MG63 and H stands for HUVECs.

### Gene expression by quantitative RT-PCR

Osteogenesis and vasculogenesis-related gene expressions of patterned cells in layer-by-layer method were investigated by quantitative real-time reverse transcriptase-polymerase chain reaction (qRT-PCR). After 4 and 7 days, total RNA was extracted from samples using Trizol reagent (Invitrogen, USA), and then converted into complementary DNA (cDNA) using ReverTra Ace® qPCR RT Kit (Toyobo, Japan). The sequences of primers for alkaline phosphatase (ALP), vascular endothelial growth factor (VEGF), collagen I (COL- I ), osteocalcin (OCN) and GAPDH genes were given in **Table 1**. Quantitative real-time PCR reaction was performed using CFX96™ real-time PCR detection system (Bio-Rad, CFX960) with SsoFast™ EvaGreen® Supermix (Bio-Rad). GAPDH was used as the housekeeping gene to normalize results. The  $\Delta\Delta\text{Ct}$ -value method was used to calculate the relative expression values. All samples were analyzed in triplicate.

**Table 1.** Primers sequences for target genes

| Symbol                             | Primers                                                      |
|------------------------------------|--------------------------------------------------------------|
| GAPDH                              | 5'-GGCATGGACTGTGGTCATGAG-3'<br>5'-TGCACCACCAACTGCTTAGC-3'    |
| Alkaline phosphatase               | 5'-GCTGGCAGTGGTCAGATGTT-3'<br>5'-CTATCCTGGCTCCGTGCTC-3'      |
| Vascular endothelial growth factor | 5'-TTGCCTTGCTGCTCTACCTCCA-3'<br>5'-GATGGCAGTAGCTGCGCTGATA-3' |
| Osteocalcin                        | 5'-TTGGACACAAAGGCTGCAC-3'<br>5'-CTCACACTCCTCGCCCTATT-3'      |
| Collagen type I                    | 5'-CACACGTCTCGGTCATGGTA-3'<br>5'-AAGAGGAAGGCCAAGTCGAG-3'     |

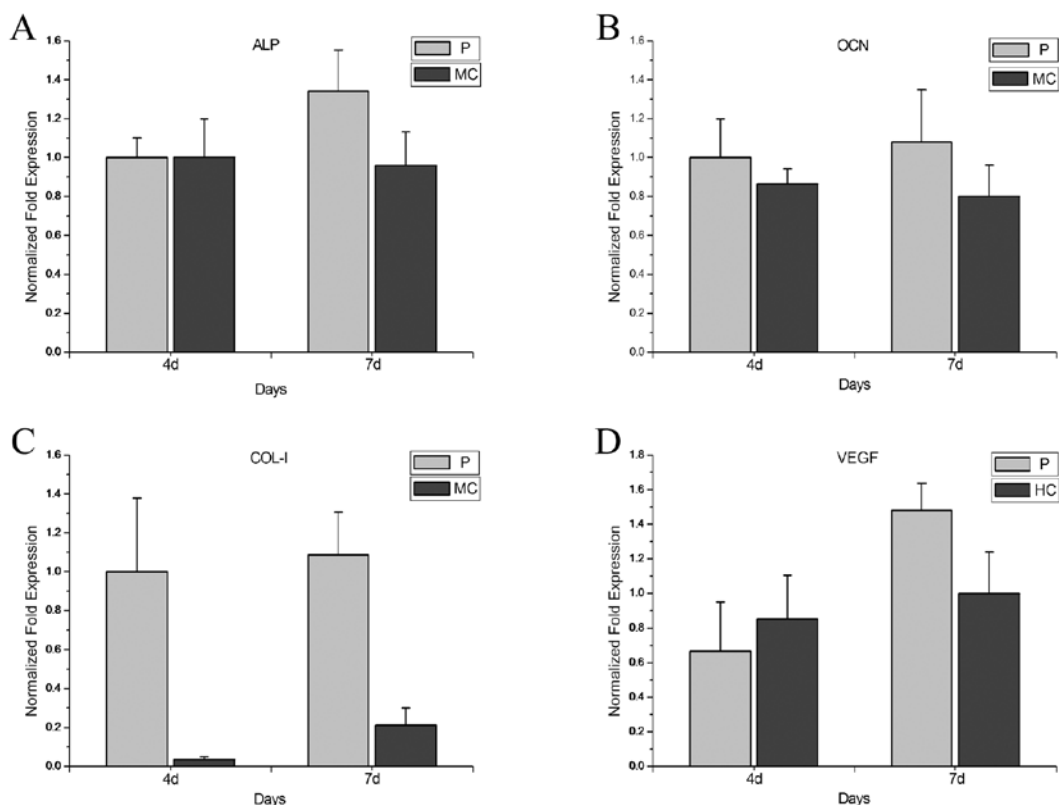

**Fig. S5** Quantitative gene expressions of MG63 and HUVEC cells cultured in hydrogel after 4 and 7 days by real-time RT-PCR. The expression levels were normalized to the expression of GAPDH as an internal control. (A) ALP, (B) OCN, (C) COL-I and (D) VEGF. P stands for MG63 and HUVEC in patterned hydrogel. MC stands for MG63 in controlled hydrogel (unpatterned, MG63 only) and HC stands for HUVEC in controlled hydrogel (unpatterned, HUVEC only).

Alkaline phosphatase (ALP), collagen I (COL-I) and osteocalcin (OCN) are markers of osteogenic differentiation, while vascular endothelial growth factor (VEGF) is a marker of vasculogenic differentiation. In the patterned hydrogel, all the gene expressions gradually increased with culture time. As for ALP, OCN and VEGF, the expression was similar or a little higher compared with the control. The expression of COL-I was significantly higher than the control indicating the enhanced osteogenic differentiation of MG63 in this patterned system. This implied that the MG63 cells patterned in the hydrogel kept the normal or even increased differentiation along osteogenic lineage, and the patterned HUVEC cells kept normal differentiation along vasculogenic lineage. This result proved this patterned system supported the osteogenesis of MG63 as well as the vasculogenesis of HUVEC.



### Immunostaining of cells in layer-by-layer patterned system

After culture for 7 days, the assembled cell-laden structures were frozen and sectioned (6  $\mu\text{m}$  in thickness), then stained with rabbit anti-OCN/PE and rabbit anti-VWF/FITC to examine the osteogenesis of MG63 and vasculogenesis of HUVEC relatively. Cells were costained to visualize the nuclei by DAPI blue, and examined using a fluorescent microscopy.

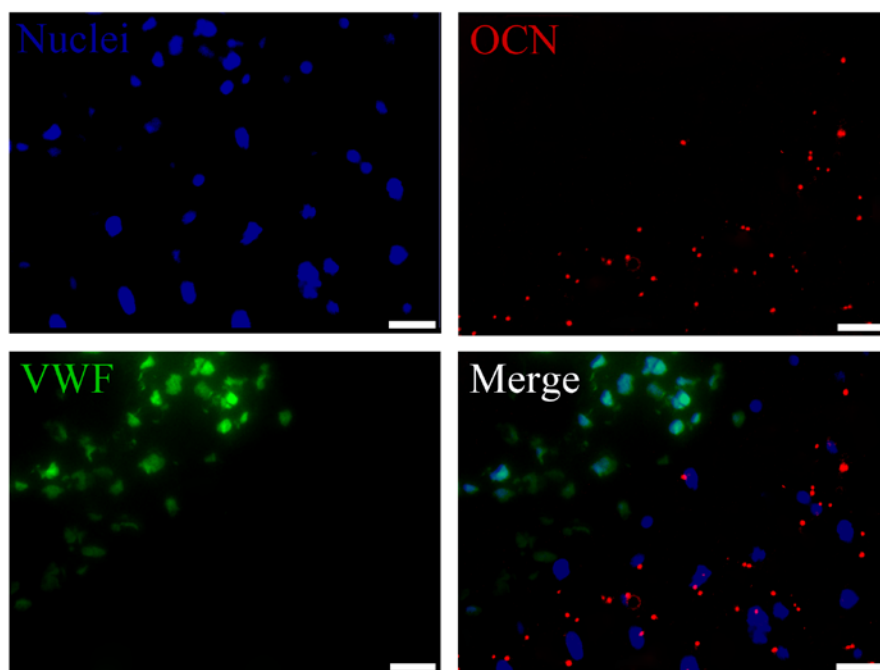

**Fig. S6** Representative immunostaining fluorescence images of MG63/HUVEC patterned system. MG63 was stained with rabbit anti-OCN/PE (red), HUVEC was stained with rabbit anti-VWF/FITC (green) and nuclei were stained with DAPI (blue). Scale bars: 50  $\mu\text{m}$ .

VWF is a marker of potent endothelial mitogens inducing angiogenesis, and its positive staining would stand for the distribution of HUVEC and the vasculogenic parts; osteocalcin (OCN) is a marker of osteogenesis, and its positive staining would stand for the bony parts in the patterned system. Except the blue staining of nuclei, positive green staining of VWF was in the inside circle indicating the vasculogenic differentiation of HUVEC, while positive red staining of OCN was in the outside area indicating the osteogenic differentiation of MG63. This result further proved the initial appearance of the osteon-like structure with designed both bony and vascular structure.

### **Data analysis**

Data from at least three independent experiments were analyzed and values were represented as mean  $\pm$  standard error of means. The t-test was used to analyze the statistical significance of the data. Values with a p value less than 0.05 were considered statistically significant.
